# Supplementary material for: Metformin for Treatment of Antipsychotic-Induced Amenorrhea and Weight Gain in Women With First-Episode Schizophrenia: A Double-Blind, Randomized, Placebo-Controlled Study
Source: Atypon-hosted journal article supplement (doi:10.1176/appi.ajp.2012.11091432), 2012-06-17
Supplement: appi.ajp.2012.11091432.ds001.pdf [file appi.ajp.2012.11091432.ds001.pdf]

Data Supplement for Wu et al., “Metformin for Treatment of Antipsychotic-Induced Amenorrhea and Weight Gain in Women With First-Episode Schizophrenia: A Double-Blind, Randomized, Placebo-Controlled Study,” *American Journal of Psychiatry* (doi: 10.1176/appi.ajp.2012.11091432)

**TABLE S1. Treatment outcomes of body weight, body mass index, insulin and insulin resistance index for all 84 randomized participants**

| Variable and week                     | Metformin group (n=42) * |      | Placebo group (n=42) * |      | Estimate <sup>#</sup> | Between-group difference |                      |
|---------------------------------------|--------------------------|------|------------------------|------|-----------------------|--------------------------|----------------------|
|                                       | Mean                     | SD   | Mean                   | SD   |                       | t Value <sup>#</sup>     | P Value <sup>#</sup> |
| <b>Weight, kg</b>                     |                          |      |                        |      |                       |                          |                      |
| Month 1                               | 56.14                    | 5.52 | 57.06                  | 5.54 | 0.92                  | 0.70                     | 0.49                 |
| Month 2                               | 55.45                    | 5.99 | 57.19                  | 5.63 | 1.742                 | 1.32                     | 0.19                 |
| Month 3                               | 54.95                    | 6.39 | 57.97                  | 5.64 | 3.012                 | 2.28                     | 0.02                 |
| Month 4                               | 54.60                    | 6.79 | 58.19                  | 5.68 | 3.582                 | 2.71                     | 0.01                 |
| Month 5                               | 54.17                    | 7.18 | 58.53                  | 5.82 | 3.582                 | 2.71                     | 0.01                 |
| Month 6                               | 54.23                    | 7.46 | 58.95                  | 5.79 | 4.72                  | 3.57                     | < 0.01               |
| <b>Body mass index</b>                |                          |      |                        |      |                       |                          |                      |
| Month 1                               | 22.25                    | 1.29 | 22.82                  | 1.29 | 0.57                  | 1.62                     | 0.12                 |
| Month 2                               | 21.98                    | 1.59 | 22.87                  | 1.24 | 0.89                  | 2.52                     | 0.01                 |
| Month 3                               | 21.78                    | 1.85 | 23.19                  | 1.33 | 1.41                  | 3.98                     | < 0.01               |
| Month 4                               | 21.64                    | 2.09 | 23.28                  | 1.37 | 1.63                  | 4.62                     | < 0.01               |
| Month 5                               | 21.47                    | 2.26 | 23.41                  | 1.43 | 1.63                  | 4.62                     | < 0.01               |
| Month 6                               | 21.49                    | 2.42 | 23.58                  | 1.43 | 2.09                  | 5.90                     | < 0.01               |
| <b>Fasting glucose, mmol/L</b>        |                          |      |                        |      |                       |                          |                      |
| Month 2                               | 5.11                     | 0.36 | 5.12                   | 0.38 | 0.01                  | 0.08                     | 0.93                 |
| Month 4                               | 5.05                     | 0.46 | 5.03                   | 0.38 | -0.02                 | -0.19                    | 0.85                 |
| Month 6                               | 5.08                     | 0.50 | 5.08                   | 0.40 | 0.01                  | 0.04                     | 0.97                 |
| <b>Insulin, <math>\mu</math>IU/mL</b> |                          |      |                        |      |                       |                          |                      |
| Month 2                               | 19.44                    | 8.28 | 21.17                  | 8.41 | 1.73                  | 0.93                     | 0.3538               |
| Month 4                               | 16.86                    | 8.13 | 21.71                  | 8.63 | 4.86                  | 2.61                     | 0.01                 |
| Month 6                               | 15.63                    | 9.26 | 21.52                  | 8.75 | 5.90                  | 3.17                     | < 0.01               |
| <b>Insulin resistance index</b>       |                          |      |                        |      |                       |                          |                      |
| Month 2                               | 4.42                     | 1.90 | 4.80                   | 1.88 | 0.37                  | 0.90                     | 0.37                 |
| Month 4                               | 3.74                     | 1.69 | 4.83                   | 1.84 | 1.02                  | 2.64                     | 0.01                 |
| Month 6                               | 3.48                     | 1.96 | 4.85                   | 1.95 | 1.37                  | 3.32                     | < 0.01               |

\* For SPSS analyses; # for SAS analyses.

**TABLE S2. Treatment outcomes of hormone levels for all 84 randomized participants**

| Variable and week    | Metformin group (n=42) * |        | Placebo group (n=42) * |        | Estimate <sup>#</sup> | Between-group difference |                      |
|----------------------|--------------------------|--------|------------------------|--------|-----------------------|--------------------------|----------------------|
|                      | Mean                     | SD     | Mean                   | SD     |                       | t Value <sup>#</sup>     | P Value <sup>#</sup> |
| Prolactin, ug/L      |                          |        |                        |        |                       |                          |                      |
| Month 2              | 142.11                   | 153.91 | 222.12                 | 229.43 | 80.01                 | 1.78                     | 0.08                 |
| Month 4              | 125.63                   | 159.79 | 223.17                 | 241.65 | 97.54                 | 2.17                     | 0.03                 |
| Month 6              | 123.79                   | 170.08 | 220.95                 | 240.92 | 97.16                 | 2.16                     | 0.03                 |
| LH, Iu/L             |                          |        |                        |        |                       |                          |                      |
| Month 2              | 10.92                    | 9.89   | 14.18                  | 11.13  | 3.26                  | 1.41                     | 0.16                 |
| Month 4              | 9.85                     | 9.69   | 14.29                  | 11.12  | 4.45                  | 1.92                     | 0.06                 |
| Month 6              | 9.34                     | 9.16   | 14.88                  | 11.14  | 5.54                  | 2.40                     | 0.02                 |
| FSH, Iu/L            |                          |        |                        |        |                       |                          |                      |
| Month 2              | 4.84                     | 2.82   | 5.57                   | 3.73   | 0.73                  | 1.00                     | 0.32                 |
| Month 4              | 5.12                     | 2.91   | 5.77                   | 3.67   | 0.65                  | 0.89                     | 0.37                 |
| Month 6              | 5.10                     | 2.54   | 5.85                   | 3.65   | 0.75                  | 1.02                     | 0.31                 |
| LH/FSH ratio         |                          |        |                        |        |                       |                          |                      |
| Month 2              | 2.61                     | 1.87   | 2.97                   | 1.66   | 0.36                  | 0.93                     | 0.35                 |
| Month 4              | 2.16                     | 1.57   | 2.79                   | 1.61   | 0.63                  | 1.62                     | 0.11                 |
| Month 6              | 2.01                     | 1.59   | 2.87                   | 1.73   | 0.86                  | 2.19                     | 0.03                 |
| Estradiol, nmol/L    |                          |        |                        |        |                       |                          |                      |
| Month 2              | 0.56                     | 0.36   | 0.48                   | 0.24   | 0.08                  | -1.28                    | 0.20                 |
| Month 4              | 0.58                     | 0.32   | 0.49                   | 0.23   | 0.10                  | -1.58                    | 0.11                 |
| Month 6              | 0.53                     | 0.33   | 0.51                   | 0.25   | 0.02                  | -0.37                    | 0.71                 |
| Testosterone, nmol/L |                          |        |                        |        |                       |                          |                      |
| Month 2              | 1.69                     | 1.06   | 1.69                   | 1.13   | 0.01                  | -0.04                    | 0.97                 |
| Month 4              | 1.63                     | 0.92   | 1.56                   | 0.94   | 0.07                  | -0.30                    | 0.77                 |
| Month 6              | 1.55                     | 0.87   | 1.56                   | 0.97   | 0.01                  | 0.04                     | 0.97                 |

Abbreviations: LH, luteinizing hormone; FSH, follicle-stimulating hormone.

\* For SPSS analyses; <sup>#</sup> for SAS analyses.
